# Supplementary material
Source: publisher figshare collection journal article supplement (https://frontiersin.figshare.com/ndownloader/files/13744202)
Supplement: Supplementary file 1 [file 13744202]

# Supplementary Table 1: Measurements of style length for the upper and lower side. Mean values and standard deviations are provided for the three different states (U: unreleased, R: released, S: steady), in both fixed and unfixed condition. Significant differences are indicated by T- or U-tests with P ≤ 0.005 highlighted (bold). Sampling for all measurements: N = 10.

|  |  |  |  | |  |  |
| --- | --- | --- | --- | --- | --- | --- |
| **Style side** | **State (treatment)** |  | **Mean length** | **K-S-Test** | | **T-test or U-test** |
| upper side | S (untreated) |  | 5.0 ± 0.3mm | Z = 0.198; P = 0.200 | |  |
|  | S (FAA) |  | 4.6 ± 0.4mm | Z = 0.168; P = 0.200 | | T = 2.571; **P = 0.019** |
|  | U (untreated) |  | 5.6 ± 0.3mm | Z = 0.233; P = 0.133 | |  |
|  | U (FAA) |  | 4.8 ± 0.3mm | Z = 0.140; P = 0.200 | | T = 5.175; **P = 0.000** |
|  | R (untreated) |  | 4.8 ± 0.2mm | Z = 0.176; P = 0.200 | |  |
|  | R (FAA) |  | 4.9 ± 0.2mm | Z = 0.271; P = 0.200 | | T = -0.844; P = 0.410 |
| lower side | S (untreated) |  | 7.8 ± 0.3mm | Z = 0.240; P = 0.106 | |  |
|  | S (FAA) |  | 6.7 ± 0.4mm | Z = 0.194; P = 0.200 | | T = 6.888; **P = 0.000** |
|  | U (untreated) |  | 6.3 ± 0.3mm | Z = 0.170; P = 0.200 | |  |
|  | U (FAA) |  | 5.5 ± 0.3mm | Z = 0.155; P = 0.200 | | T = 6.060; **P = 0.000** |
|  | R (untreated) |  | 10.7 ± 0.5mm | Z = 0.335; **P = 0.002** | |  |
|  | R (FAA) |  | 8.8 ± 0.3mm | Z = 0.271; **P = 0.036** | | U = -3.780, **P = 0.000** |
|  |  |  |  | |  |  |
